# Supplementary material for: New Cinchona Oximes Evaluated as Reactivators of Acetylcholinesterase and Butyrylcholinesterase Inhibited by Organophosphorus Compounds
Source: PubMed Central journal article supplement (PMC6151989; doi:10.3390/molecules22071234), 2017-07-22
Supplement: molecules-22-01234-s001.pdf [file molecules-22-01234-s001.pdf]

## Supplemental Material

# New Cinchona Oximes Evaluated as Reactivators of Acetylcholinesterase and Butyrylcholinesterase Inhibited by Organophosphorus Compounds

Maja Katalinić <sup>1</sup>, Antonio Zandona <sup>1</sup>, Alma Ramić <sup>2</sup>, Tamara Zorbaz <sup>1</sup>, Ines Primožič <sup>2,\*</sup> and Zrinka Kovarik <sup>1,\*</sup>

<sup>1</sup> Institute for Medical Research and Occupational Health, POB 291, HR-10001 Zagreb, Croatia; mkatalinic@imi.hr (M.K.); azandona@imi.hr (A.Z.); tzorbaz@imi.hr (T.Z.)

<sup>2</sup> Department of Chemistry, Faculty of Science, University of Zagreb, HR-10001 Zagreb, Croatia; alma.ramic@gmail.com

\* Correspondence: ines.primozic@chem.pmf.hr (I.P.); zkovarik@imi.hr (Z.K.); Tel.: +385-1-4606-408 (I.P.); +385-1-4682-555 (Z.K.)

## Content

|                                                                                         |    |
|-----------------------------------------------------------------------------------------|----|
| <b>S1. Time-dependent course of reactivation of hBChE</b> .....                         | 2  |
| <b>S2. Atom numbering of Cinchona alkaloid derivatives</b> .....                        | 3  |
| <b>S3. IR, <sup>1</sup>H and <sup>13</sup>C NMR spectra of prepared compounds</b> ..... | 4  |
| Cinchonin-9-one .....                                                                   | 4  |
| Cinchona-9-oxime (C1).....                                                              | 5  |
| <i>N</i> -methyl-9-hydroxyiminocinchonium iodide (C2).....                              | 7  |
| <i>N</i> -benzyl-9-hydroxyiminocinchonium bromide (C3).....                             | 8  |
| <b>S4. Quantum-chemical calculations</b> .....                                          | 10 |

## S1. Time-dependent course of reactivation of hBChE

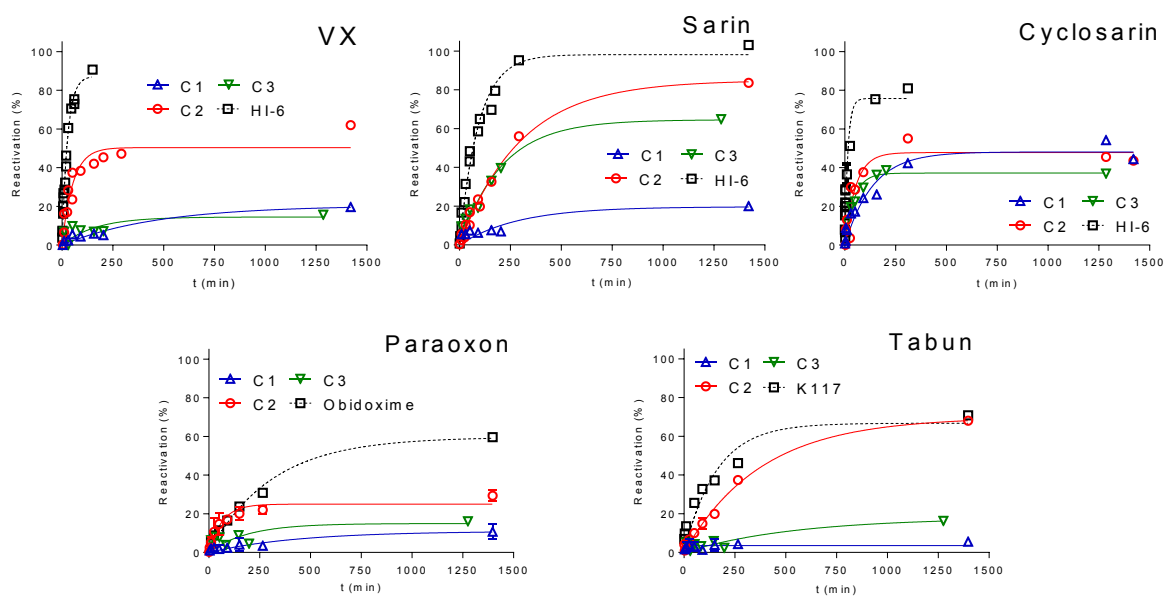

**Figure S1.** Time-dependent course of reactivation of hBChE by 0.1 mM oximes (or 0.05 mM C3) at 25 °C.

## S2. Atom numbering of Cinchona alkaloid derivatives

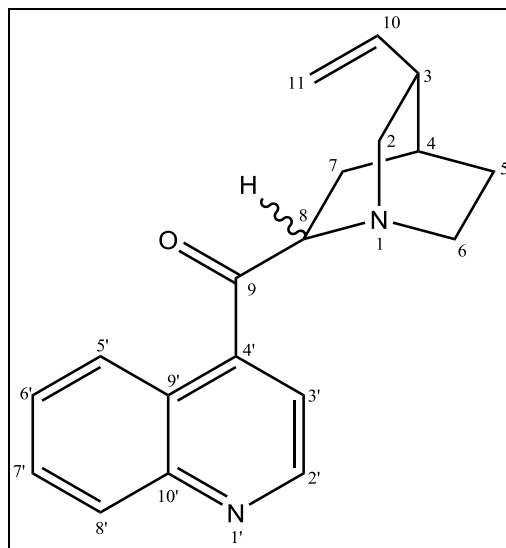

**Figure S2.** Labeling scheme of prepared compounds

### S3. IR, $^1\text{H}$ and $^{13}\text{C}$ NMR spectra of prepared compounds

#### Cinchonin-9-one

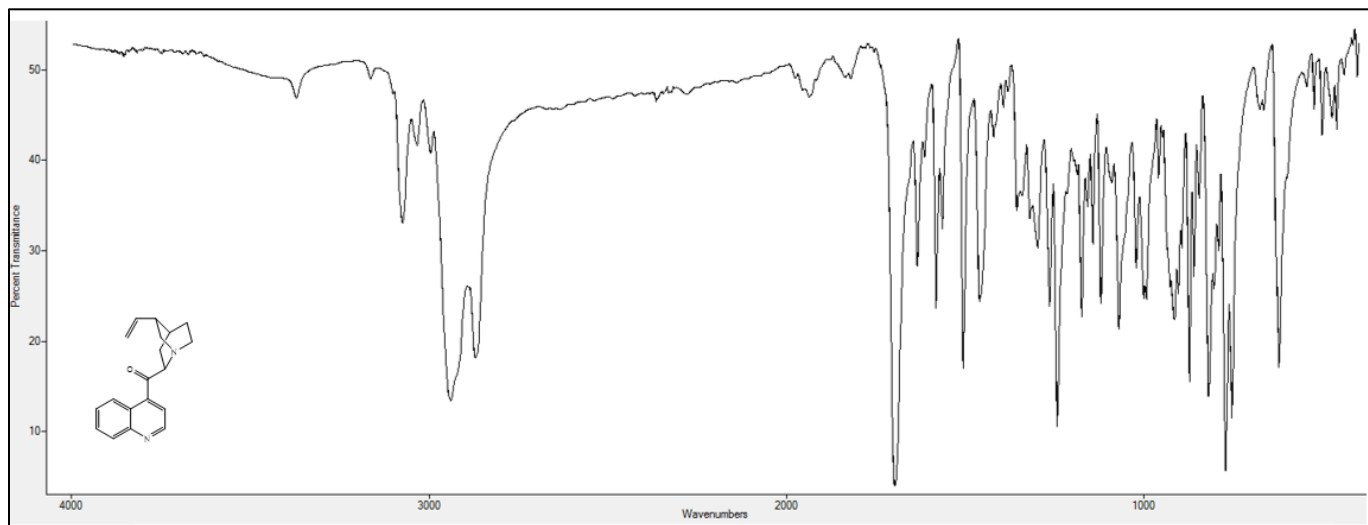

Figure S3. IR spektra of Cinchonin-9-one

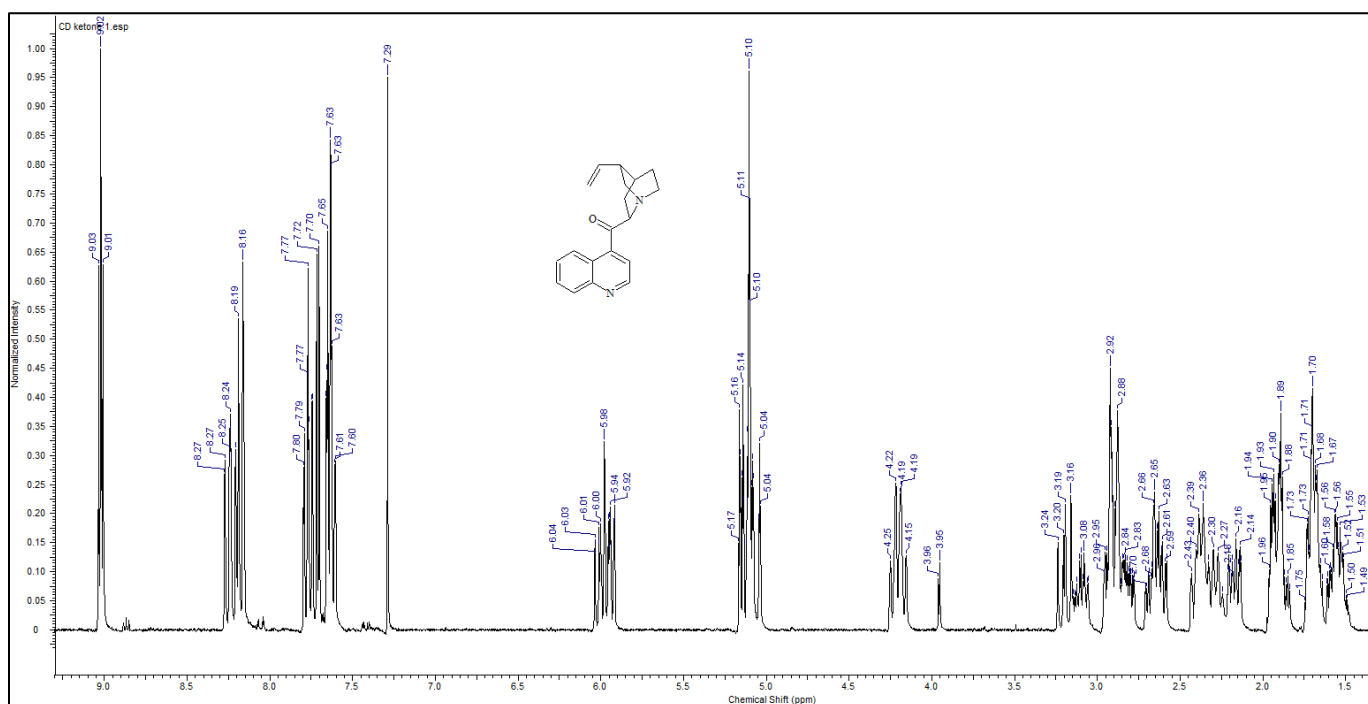

Figure S4.  $^1\text{H}$  NMR spectra of Cinchonin-9-one

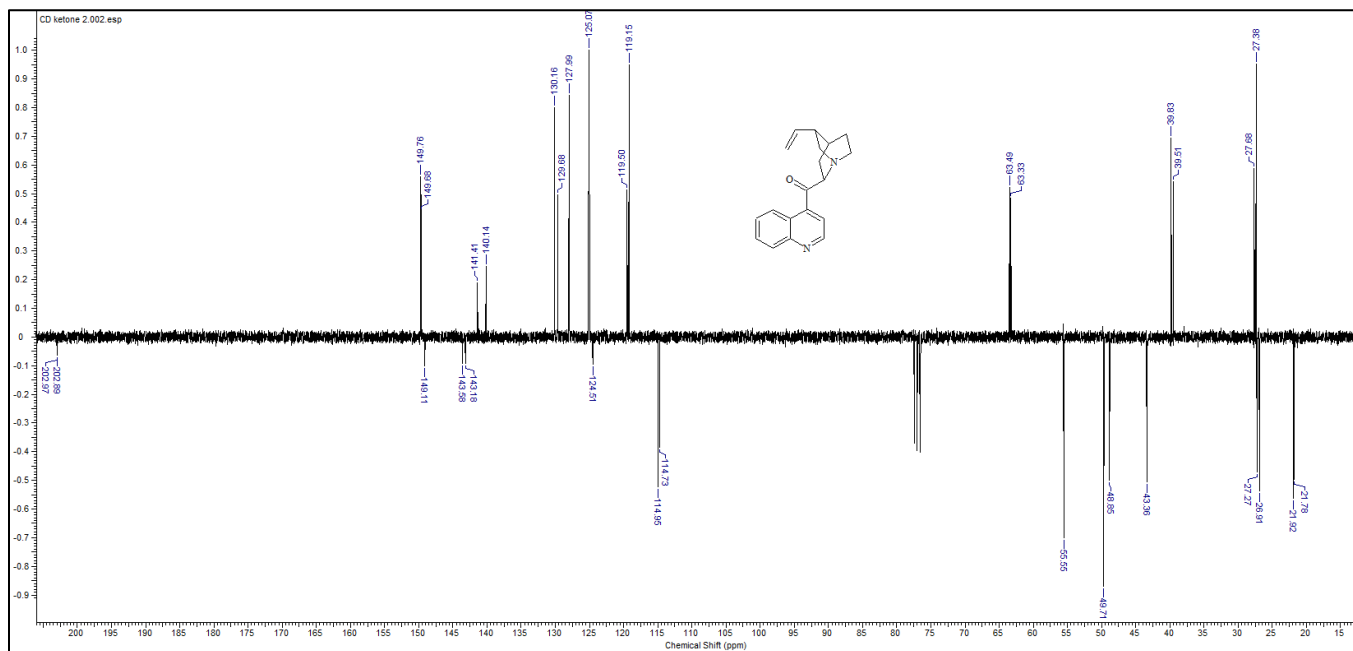

Figure S5.  $^{13}\text{C}$  NMR spectra of Cinchonin-9-one

### Cinchona-9-oxime (C1)

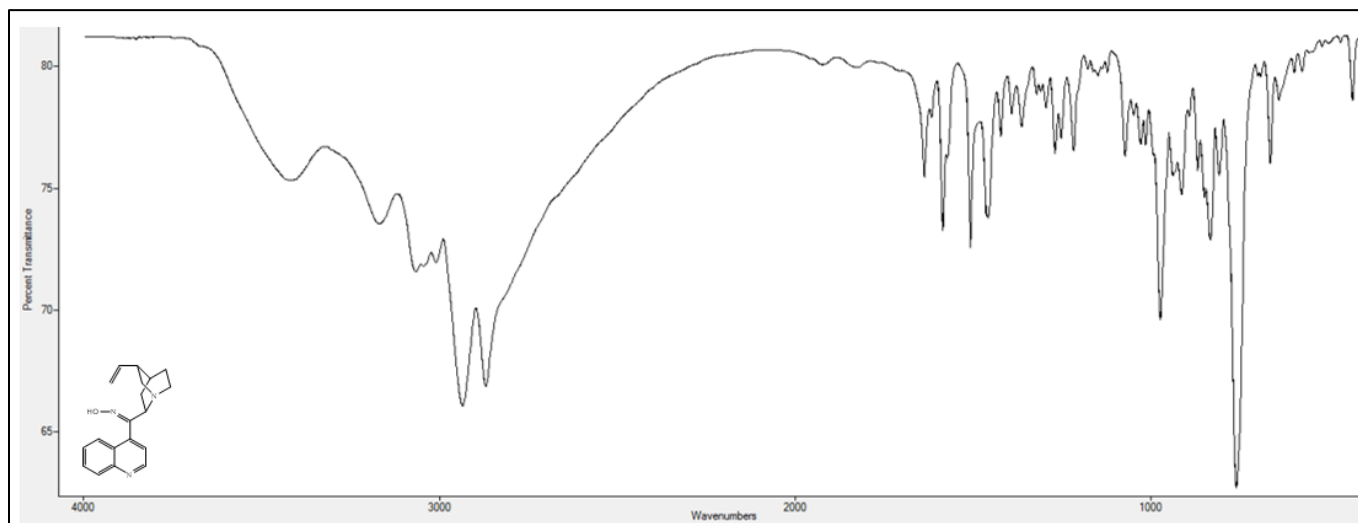

Figure S6. IR spektra of Cinchona-9-oxime

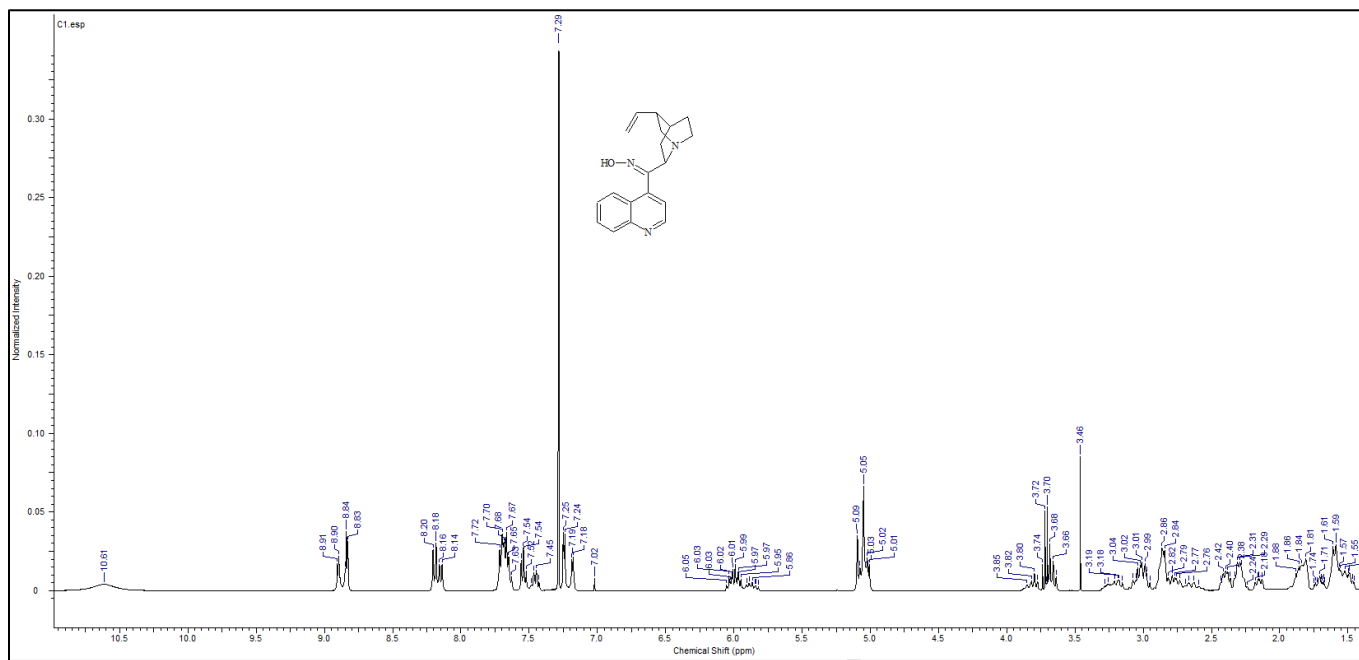Figure S7. <sup>1</sup>H NMR spectra of Cinchona-9-oxime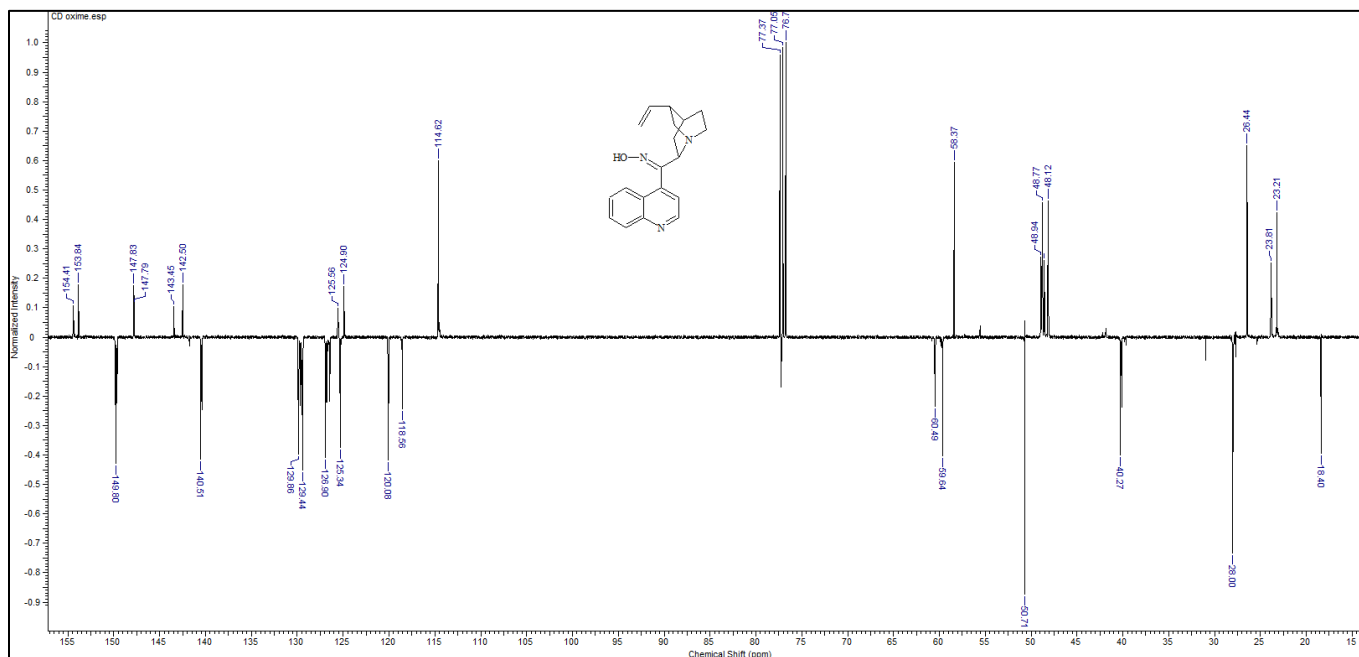Figure S8. <sup>13</sup>C NMR spectra of Cinchona-9-oxime

*N*-methyl-9-hydroxyiminocinchonium iodide (C2)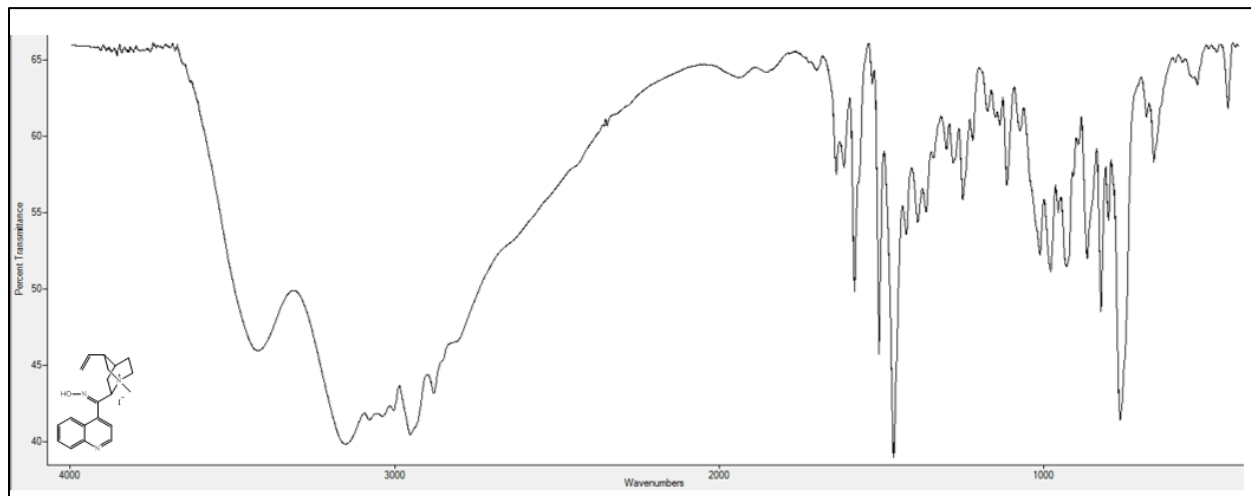**Figure S9.** IR spektra of *N*-methyl-9-hydroxyiminocinchonium iodide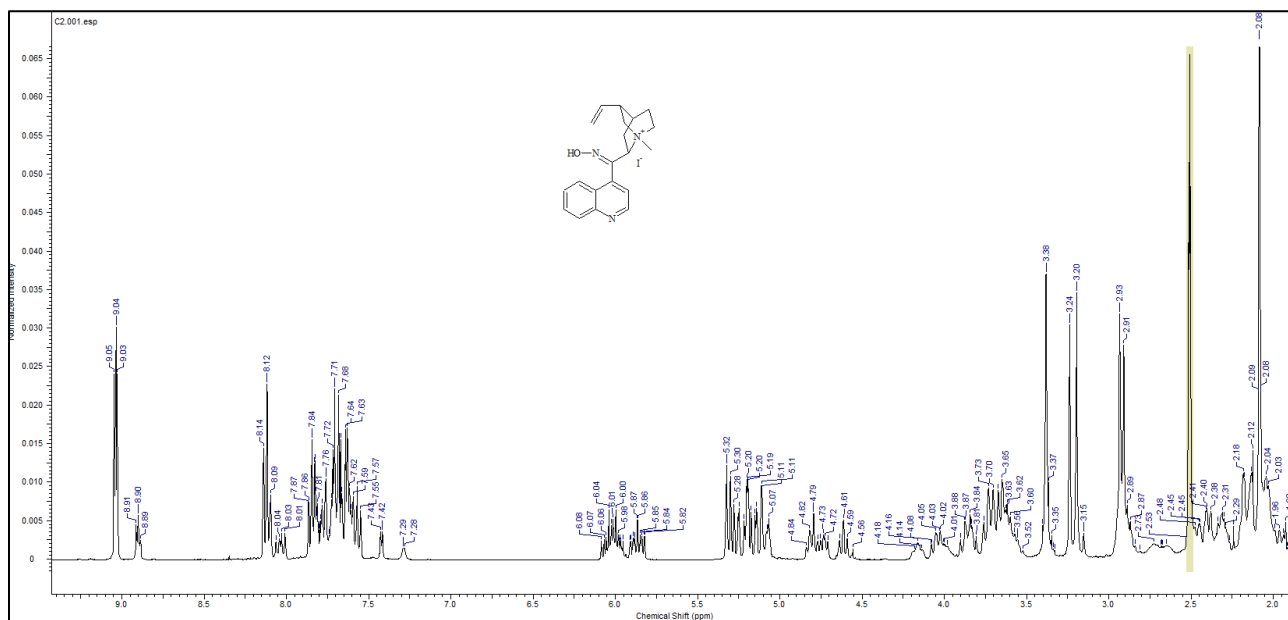**Figure S10.** <sup>1</sup>H NMR spectra of *N*-methyl-9-hydroxyiminocinchonium iodide

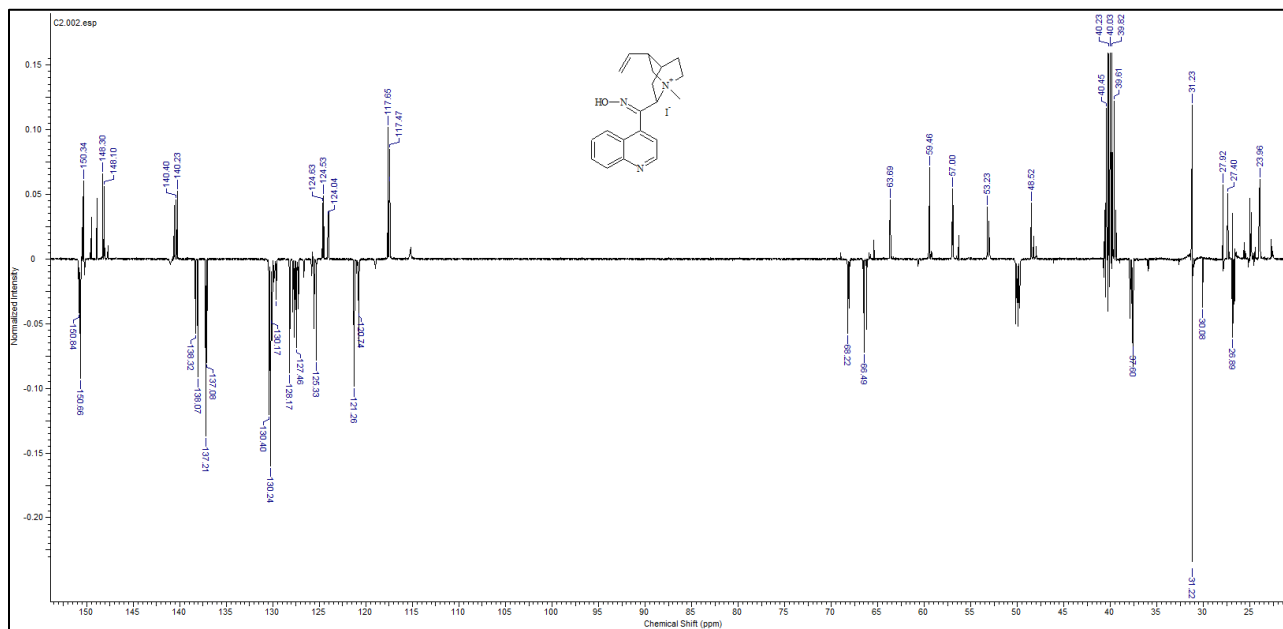

Figure S11. <sup>13</sup>C NMR spectra of *N*-methyl-9-hydroxyiminocinchonium iodide

### *N*-benzyl-9-hydroxyiminocinchonium bromide (C3)

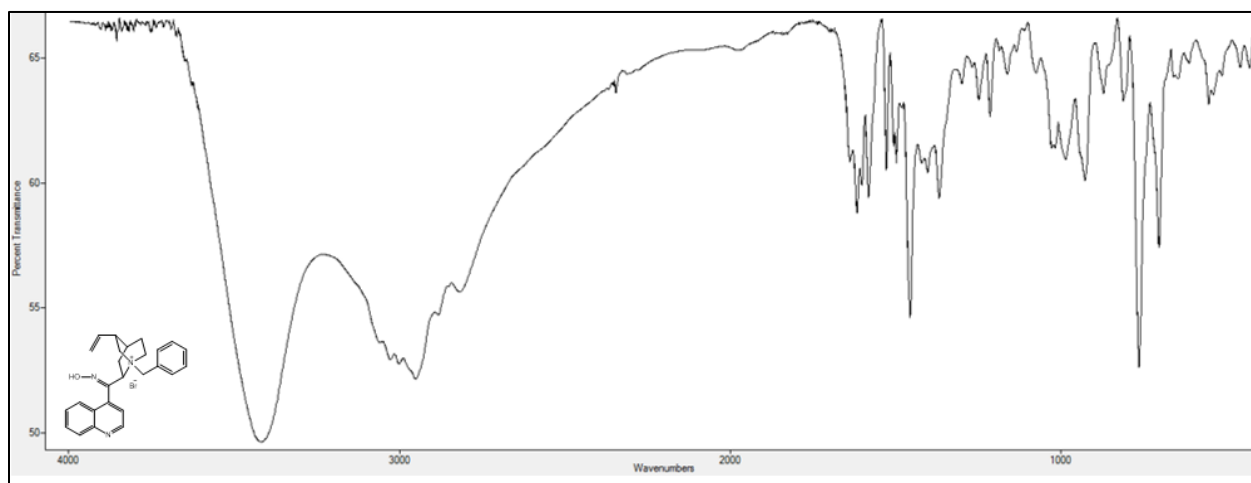

Figure S12. IR spektra of *N*-benzyl-9-hydroxyiminocinchonium bromide



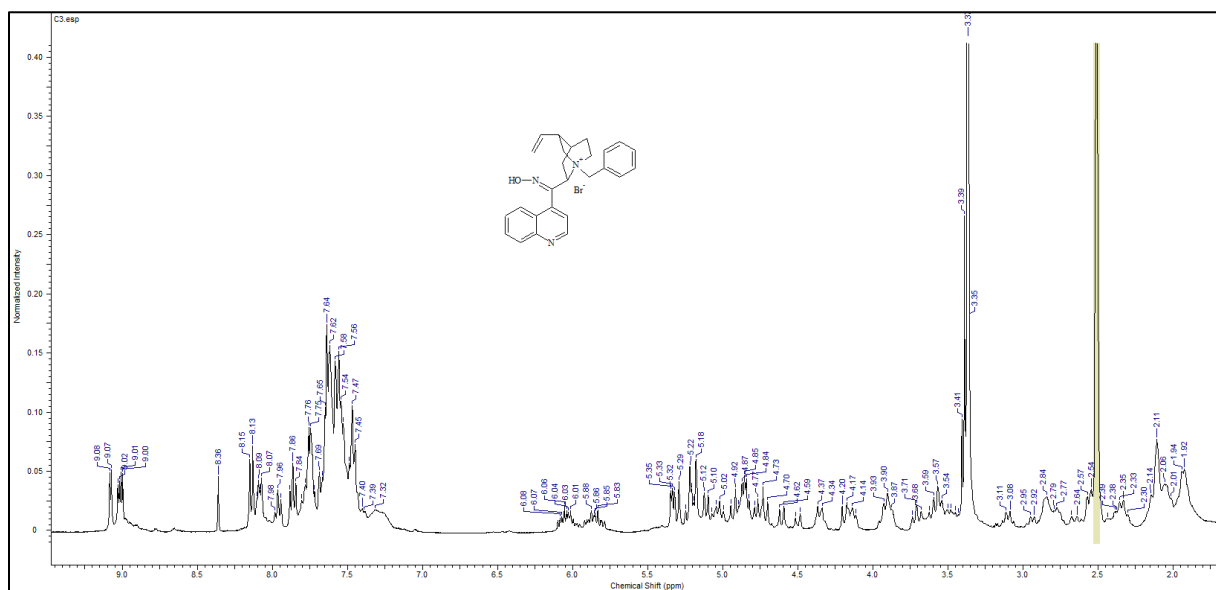

Figure S13. <sup>1</sup>H NMR spectra of N-benzyl-9-hydroxyiminocinchonium bromide

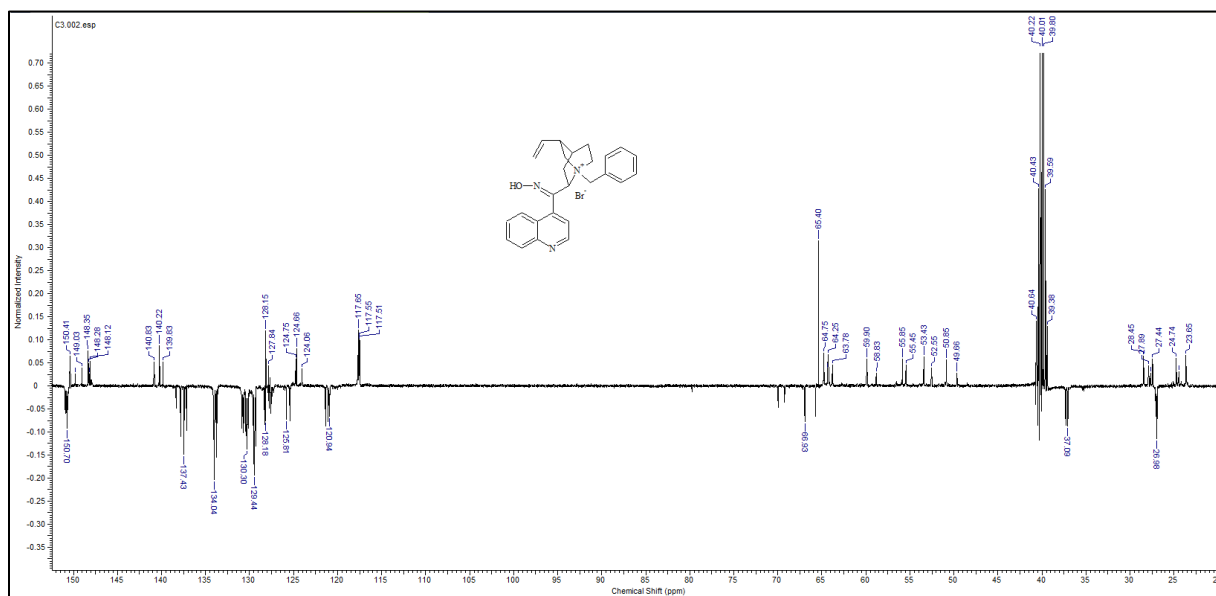

Figure S14. <sup>13</sup>C NMR spectra of N-benzyl-9-hydroxyiminocinchonium bromide

## S4. Quantum-chemical calculations

**Table S1.** Calculated  $^{13}\text{C}$  and  $^1\text{H}$  NMR chemical shifts (B3LYP/6-311++G(d,p)) for Cinchonin-9-one and Cinchonidin-9-one relative to tetramethylsilane

| Atom | $\delta$ (Cinchonin-9-one) /<br>ppm | $\delta$ (Cinchonidin-9-one)<br>/ ppm |
|------|-------------------------------------|---------------------------------------|
| C8   | 67.2                                | 68.4                                  |
| C6   | 54.4                                | 45.6                                  |
| C7   | 30.2                                | 28.8                                  |
| C5   | 32.2                                | 32.8                                  |
| C4   | 37.0                                | 36.1                                  |
| C2   | 54.5                                | 61.9                                  |
| C3   | 49.9                                | 49.2                                  |
| C9   | 209.8                               | 215.8                                 |
| C4'  | 150.0                               | 155.6                                 |
| C9'  | 132.3                               | 131.0                                 |
| C10' | 157.9                               | 157.5                                 |
| C2'  | 155.8                               | 155.8                                 |
| C3'  | 123.5                               | 126.5                                 |
| C5'  | 132.5                               | 134.0                                 |
| C6'  | 134.1                               | 133.7                                 |
| C7'  | 135.5                               | 135.1                                 |
| C8'  | 138.5                               | 138.8                                 |
| C10  | 151.0                               | 152.7                                 |
| C11  | 119.8                               | 119.9                                 |
| H8   | 4.4                                 | 4.1                                   |
| H6   | 3.0                                 | 2.7                                   |
| H6   | 3.1                                 | 3.6                                   |
| H7   | 1.4                                 | 2.0                                   |
| H7   | 1.6                                 | 1.7                                   |
| H5   | 1.6                                 | 1.5                                   |
| H5   | 1.6                                 | 2.0                                   |
| H4   | 1.5                                 | 1.7                                   |
| H2   | 3.7                                 | 2.8                                   |
| H2   | 3.0                                 | 3.3                                   |
| H3   | 2.1                                 | 2.2                                   |
| H2'  | 9.3                                 | 9.3                                   |
| H3'  | 7.5                                 | 7.6                                   |
| H5'  | 8.9                                 | 9.7                                   |
| H6'  | 7.9                                 | 7.8                                   |
| H7'  | 8.0                                 | 8.0                                   |
| H8'  | 8.5                                 | 8.6                                   |
| H10  | 6.3                                 | 6.2                                   |
| H11  | 5.1                                 | 5.2                                   |
| H11  | 5.3                                 | 5.3                                   |

**Table S2.** Calculated  $^{13}\text{C}$  and  $^1\text{H}$  NMR chemical shifts (B3LYP/6-311++G(d,p)) for *anti* and *syn* cinchonin-9-on ketoxime relative to tetramethylsilane

| Atom | $\delta$ ( <i>anti</i> -cinchonin-9-on ketoxime) / ppm | $\delta$ ( <i>syn</i> -cinchonin-9-on ketoxime) / ppm |
|------|--------------------------------------------------------|-------------------------------------------------------|
| C8   | 69.2                                                   | 67.4                                                  |
| C6   | 54.0                                                   | 54.6                                                  |
| C7   | 30.4                                                   | 31.0                                                  |
| C5   | 32.0                                                   | 31.7                                                  |
| C4   | 36.5                                                   | 36.1                                                  |
| C2   | 58.1                                                   | 54.8                                                  |
| C3   | 49.6                                                   | 50.3                                                  |
| C9   | 164.2                                                  | 165.1                                                 |
| C4'  | 152.4                                                  | 150.0                                                 |
| C9'  | 134.8                                                  | 132.7                                                 |
| C10' | 157.6                                                  | 156.7                                                 |
| C2'  | 155.7                                                  | 156.0                                                 |
| C3'  | 124.5                                                  | 123.9                                                 |
| C5'  | 132.2                                                  | 133.7                                                 |
| C6'  | 132.3                                                  | 132.2                                                 |
| C7'  | 134.9                                                  | 134.9                                                 |
| C8'  | 138.6                                                  | 138.8                                                 |
| C10  | 151.2                                                  | 151.4                                                 |
| C11  | 119.4                                                  | 119.4                                                 |
| H8   | 4.2                                                    | 3.9                                                   |
| H6   | 3.0                                                    | 2.9                                                   |
| H6   | 3.1                                                    | 3.0                                                   |
| H7   | 1.0                                                    | 1.1                                                   |
| H7   | 1.5                                                    | 1.7                                                   |
| H5   | 1.5                                                    | 1.5                                                   |
| H5   | 1.5                                                    | 1.5                                                   |
| H4   | 1.3                                                    | 1.4                                                   |
| H2   | 3.4                                                    | 3.4                                                   |
| H2   | 3.2                                                    | 2.9                                                   |
| H3   | 2.1                                                    | 2.1                                                   |
| H2'  | 9.2                                                    | 9.2                                                   |
| H3'  | 7.3                                                    | 7.3                                                   |
| H5'  | 8.6                                                    | 8.2                                                   |
| H6'  | 7.8                                                    | 7.8                                                   |
| H7'  | 8.0                                                    | 8.0                                                   |
| H8'  | 8.5                                                    | 8.5                                                   |
| H10  | 6.4                                                    | 6.4                                                   |
| H11  | 5.2                                                    | 5.2                                                   |
| H11  | 5.3                                                    | 5.3                                                   |
| OH   | 6.7                                                    | 6.3                                                   |

**Table S3.** Calculated  $^{13}\text{C}$  and  $^1\text{H}$  NMR chemical shifts (B3LYP/6-311++G(d,p)) for *anti* and *syn* cinchonidin-9-on ketoxime relative to tetramethylsilane

| Atom | $\delta$ ( <i>anti</i> -cinchonidin-9-on ketoxime) / ppm | $\delta$ ( <i>anti</i> -cinchonidin-9-on ketoxime) / ppm |
|------|----------------------------------------------------------|----------------------------------------------------------|
| C8   | 65.0                                                     | 65.9                                                     |
| C6   | 45.9                                                     | 47.3                                                     |
| C7   | 29.7                                                     | 33.6                                                     |
| C5   | 32.3                                                     | 33.5                                                     |
| C4   | 34.6                                                     | 36.6                                                     |
| C2   | 59.7                                                     | 63.9                                                     |
| C3   | 49.3                                                     | 49.8                                                     |
| C9   | 162.5                                                    | 168.8                                                    |
| C4'  | 153.3                                                    | 149.2                                                    |
| C9'  | 134.1                                                    | 132.2                                                    |
| C10' | 156.8                                                    | 157.1                                                    |
| C2'  | 157.1                                                    | 155.6                                                    |
| C3'  | 127.7                                                    | 125.9                                                    |
| C5'  | 131.2                                                    | 131.2                                                    |
| C6'  | 132.4                                                    | 132.9                                                    |
| C7'  | 134.6                                                    | 135.2                                                    |
| C8'  | 139.3                                                    | 138.9                                                    |
| C10  | 151.4                                                    | 153.0                                                    |
| C11  | 121.1                                                    | 119.3                                                    |
| H8   | 4.6                                                      | 3.7                                                      |
| H6   | 2.7                                                      | 2.7                                                      |
| H6   | 3.1                                                      | 4.0                                                      |
| H7   | 0.8                                                      | 1.4                                                      |
| H7   | 1.8                                                      | 1.8                                                      |
| H5   | 1.4                                                      | 1.4                                                      |
| H5   | 1.4                                                      | 1.6                                                      |
| H4   | 1.3                                                      | 1.6                                                      |
| H2   | 2.8                                                      | 2.6                                                      |
| H2   | 3.2                                                      | 3.2                                                      |
| H3   | 2.1                                                      | 2.0                                                      |
| H2'  | 9.3                                                      | 9.2                                                      |
| H3'  | 7.5                                                      | 7.3                                                      |
| H5'  | 7.8                                                      | 8.1                                                      |
| H6'  | 7.8                                                      | 7.8                                                      |
| H7'  | 7.9                                                      | 8.0                                                      |
| H8'  | 8.5                                                      | 8.6                                                      |
| H10  | 6.3                                                      | 6.0                                                      |
| H11  | 5.2                                                      | 5.0                                                      |
| H11  | 5.3                                                      | 5.2                                                      |
| OH   | 13.3                                                     | 6.3                                                      |
